# Supplementary material
Source: Springer Nature journal article supplement (https://www.springermedizin.de/resource/supplementary/12879_2013_2648_MOESM2_ESM.pdf/9444986)
Supplement: MOESM2 [file 9444986]

**Additional file 2.** Binary data matrix. Each AFLP band was treated as a separate character and scored 1 (present) or 0 (absent).

| #  | A   | B   | C    | D    | E    | F    | G    | H    | I    | J    | K    | L   | M   | N    | O    | P    | Q    | R    | S  | T  | U   | V   | W    | X     | Y     | Z     | AA    | AB    | AC    | AD    | AE    | AF    | AG    |   |   |   |   |
|----|-----|-----|------|------|------|------|------|------|------|------|------|-----|-----|------|------|------|------|------|----|----|-----|-----|------|-------|-------|-------|-------|-------|-------|-------|-------|-------|-------|---|---|---|---|
| 1  | 1   | 170 | 32   |      |      |      |      |      |      |      |      |     |     |      |      |      |      |      |    |    |     |     |      |       |       |       |       |       |       |       |       |       |       |   |   |   |   |
| 2  |     | M10 | M120 | M140 | M150 | M230 | M280 | M300 | M390 | M540 | M570 | HU1 | HU2 | HU11 | HU12 | HU16 | HU19 | HU24 | MA | 37 | 525 | Sif | ◆◆◆◆ | 07308 | 07309 | 07312 | 07313 | 07313 | 08337 | 08337 | 08338 | 08338 | 08338 |   |   |   |   |
| 3  | 999 | 1   | 1    | 0    | 1    | 1    | 0    | 1    | 0    | 1    | 0    | 1   | 1   | 1    | 1    | 1    | 1    | 1    | 1  | 1  | 1   | 1   | 1    | 1     | 1     | 1     | 1     | 1     | 1     | 1     | 1     | 1     | 1     | 1 |   |   |   |
| 4  | 999 | 0   | 0    | 0    | 0    | 0    | 0    | 0    | 0    | 0    | 0    | 1   | 1   | 0    | 1    | 1    | 1    | 0    | 0  | 1  | 0   | 0   | 0    | 0     | 1     | 0     | 0     | 0     | 0     | 0     | 0     | 0     | 1     | 1 |   |   |   |
| 5  | 999 | 1   | 0    | 0    | 1    | 1    | 0    | 0    | 1    | 0    | 0    | 1   | 1   | 1    | 1    | 1    | 1    | 0    | 0  | 0  | 0   | 0   | 1    | 1     | 1     | 1     | 1     | 1     | 1     | 1     | 1     | 0     | 0     | 0 |   |   |   |
| 6  | 999 | 1   | 1    | 0    | 1    | 1    | 0    | 1    | 1    | 0    | 1    | 1   | 1   | 1    | 1    | 1    | 1    | 1    | 1  | 1  | 0   | 0   | 0    | 1     | 1     | 1     | 1     | 1     | 1     | 1     | 1     | 0     | 0     | 1 |   |   |   |
| 7  | 999 | 1   | 1    | 1    | 1    | 1    | 1    | 1    | 0    | 0    | 0    | 1   | 1   | 1    | 1    | 1    | 0    | 0    | 0  | 0  | 0   | 0   | 1    | 1     | 1     | 1     | 1     | 1     | 1     | 1     | 1     | 0     | 1     | 1 |   |   |   |
| 8  | 999 | 0   | 1    | 0    | 0    | 0    | 0    | 0    | 1    | 1    | 0    | 0   | 0   | 0    | 1    | 1    | 1    | 1    | 1  | 0  | 0   | 0   | 1    | 0     | 0     | 0     | 0     | 0     | 0     | 0     | 0     | 0     | 1     | 1 |   |   |   |
| 9  | 999 | 1   | 1    | 1    | 1    | 1    | 1    | 1    | 0    | 1    | 1    | 1   | 1   | 1    | 1    | 1    | 1    | 1    | 1  | 1  | 1   | 1   | 1    | 1     | 1     | 1     | 1     | 1     | 1     | 1     | 1     | 1     | 1     | 1 |   |   |   |
| 10 | 999 | 1   | 1    | 0    | 1    | 1    | 0    | 1    | 1    | 1    | 0    | 1   | 1   | 1    | 1    | 1    | 1    | 1    | 1  | 1  | 0   | 1   | 1    | 1     | 1     | 1     | 1     | 1     | 1     | 1     | 1     | 1     | 1     | 1 |   |   |   |
| 11 | 999 | 1   | 1    | 0    | 1    | 1    | 1    | 1    | 1    | 1    | 0    | 1   | 1   | 1    | 1    | 1    | 1    | 1    | 1  | 1  | 0   | 1   | 1    | 1     | 1     | 1     | 1     | 1     | 1     | 1     | 1     | 1     | 1     | 1 |   |   |   |
| 12 | 999 | 0   | 1    | 0    | 0    | 1    | 0    | 1    | 1    | 0    | 1    | 1   | 1   | 1    | 1    | 1    | 0    | 0    | 0  | 0  | 0   | 0   | 1    | 1     | 1     | 1     | 1     | 1     | 1     | 1     | 0     | 1     | 1     | 1 |   |   |   |
| 13 | 999 | 1   | 0    | 0    | 1    | 0    | 0    | 0    | 0    | 0    | 1    | 0   | 1   | 1    | 1    | 1    | 0    | 0    | 0  | 0  | 1   | 0   | 0    | 0     | 0     | 0     | 0     | 0     | 0     | 0     | 0     | 0     | 0     | 0 | 0 |   |   |
| 14 | 999 | 0   | 0    | 0    | 0    | 0    | 0    | 0    | 0    | 0    | 0    | 0   | 0   | 0    | 0    | 0    | 0    | 0    | 0  | 0  | 0   | 0   | 0    | 0     | 0     | 0     | 0     | 0     | 0     | 0     | 0     | 0     | 0     | 0 | 0 |   |   |
| 15 | 999 | 1   | 1    | 0    | 0    | 0    | 0    | 0    | 0    | 0    | 1    | 1   | 0   | 0    | 0    | 0    | 0    | 0    | 0  | 0  | 0   | 0   | 0    | 0     | 0     | 0     | 0     | 0     | 0     | 0     | 0     | 0     | 0     | 0 | 0 |   |   |
| 16 | 999 | 0   | 0    | 0    | 0    | 0    | 0    | 0    | 0    | 0    | 0    | 0   | 0   | 0    | 0    | 0    | 0    | 0    | 0  | 0  | 0   | 0   | 0    | 0     | 0     | 0     | 0     | 0     | 0     | 0     | 0     | 0     | 0     | 0 | 0 |   |   |
| 17 | 999 | 1   | 1    | 0    | 1    | 1    | 0    | 1    | 0    | 1    | 0    | 1   | 1   | 1    | 1    | 1    | 0    | 0    | 0  | 0  | 0   | 0   | 0    | 0     | 0     | 0     | 0     | 0     | 0     | 0     | 0     | 0     | 0     | 0 | 0 | 0 |   |
| 18 | 999 | 0   | 1    | 0    | 0    | 0    | 0    | 0    | 0    | 0    | 0    | 0   | 0   | 0    | 0    | 0    | 0    | 0    | 0  | 0  | 0   | 0   | 0    | 0     | 0     | 0     | 0     | 0     | 0     | 0     | 0     | 0     | 0     | 0 | 0 | 0 |   |
| 19 | 999 | 1   | 0    | 1    | 1    | 1    | 1    | 1    | 1    | 1    | 0    | 1   | 1   | 1    | 1    | 1    | 0    | 0    | 0  | 0  | 0   | 0   | 0    | 0     | 0     | 0     | 0     | 0     | 0     | 0     | 0     | 0     | 0     | 0 | 0 | 0 |   |
| 20 | 999 | 1   | 1    | 0    | 0    | 1    | 1    | 0    | 1    | 1    | 1    | 1   | 1   | 1    | 1    | 0    | 0    | 0    | 0  | 0  | 0   | 0   | 0    | 0     | 0     | 0     | 0     | 0     | 0     | 0     | 0     | 0     | 0     | 0 | 0 | 0 |   |
| 21 | 999 | 1   | 0    | 1    | 1    | 0    | 0    | 0    | 1    | 1    | 0    | 1   | 1   | 1    | 1    | 1    | 1    | 1    | 1  | 1  | 0   | 0   | 0    | 0     | 0     | 0     | 0     | 0     | 0     | 0     | 0     | 0     | 0     | 0 | 0 | 0 |   |
| 22 | 999 | 1   | 1    | 1    | 1    | 1    | 1    | 1    | 1    | 1    | 1    | 1   | 1   | 1    | 1    | 1    | 1    | 1    | 1  | 1  | 1   | 1   | 1    | 1     | 1     | 1     | 1     | 1     | 1     | 1     | 1     | 1     | 1     | 1 | 1 |   |   |
| 23 | 999 | 1   | 0    | 0    | 1    | 0    | 0    | 0    | 1    | 1    | 1    | 1   | 1   | 0    | 0    | 1    | 1    | 1    | 1  | 1  | 0   | 1   | 0    | 0     | 0     | 0     | 0     | 0     | 0     | 0     | 0     | 0     | 0     | 0 | 0 | 0 |   |
| 24 | 1   | 1   | 1    | 1    | 1    | 1    | 1    | 1    | 1    | 1    | 1    | 1   | 1   | 1    | 1    | 1    | 1    | 1    | 1  | 1  | 1   | 999 | 0    | 1     | 1     | 999   | 1     | 1     | 1     | 1     | 1     | 1     | 1     | 1 | 1 | 1 |   |
| 25 | 0   | 0   | 0    | 0    | 0    | 0    | 0    | 0    | 0    | 0    | 0    | 0   | 0   | 0    | 0    | 0    | 0    | 0    | 0  | 0  | 0   | 999 | 0    | 0     | 0     | 999   | 0     | 0     | 0     | 0     | 0     | 0     | 0     | 0 | 0 | 0 |   |
| 26 | 1   | 1   | 1    | 1    | 1    | 1    | 1    | 1    | 1    | 1    | 1    | 1   | 1   | 1    | 1    | 1    | 1    | 1    | 1  | 1  | 1   | 999 | 0    | 1     | 1     | 999   | 1     | 1     | 1     | 1     | 1     | 1     | 1     | 1 | 1 | 1 |   |
| 27 | 0   | 1   | 0    | 1    | 0    | 1    | 1    | 1    | 1    | 1    | 1    | 1   | 0   | 1    | 1    | 1    | 1    | 1    | 1  | 0  | 0   | 999 | 0    | 1     | 0     | 0     | 999   | 0     | 0     | 1     | 1     | 1     | 1     | 0 | 0 | 1 |   |
| 28 | 1   | 0   | 0    | 0    | 0    | 0    | 0    | 0    | 0    | 0    | 0    | 0   | 0   | 0    | 0    | 0    | 0    | 0    | 0  | 0  | 0   | 999 | 0    | 0     | 0     | 999   | 0     | 0     | 0     | 0     | 0     | 0     | 0     | 0 | 0 | 0 |   |
| 29 | 1   | 0   | 0    | 0    | 0    | 0    | 0    | 0    | 0    | 0    | 0    | 0   | 0   | 0    | 0    | 0    | 0    | 0    | 0  | 0  | 0   | 999 | 0    | 0     | 0     | 999   | 0     | 0     | 0     | 0     | 0     | 0     | 0     | 0 | 0 | 0 |   |
| 30 | 0   | 1   | 0    | 1    | 1    | 1    | 1    | 1    | 1    | 1    | 1    | 1   | 1   | 1    | 1    | 1    | 1    | 1    | 1  | 1  | 1   | 999 | 0    | 1     | 1     | 999   | 1     | 1     | 1     | 1     | 1     | 1     | 1     | 1 | 1 | 1 |   |
| 31 | 0   | 0   | 0    | 1    | 0    | 0    | 0    | 0    | 0    | 0    | 0    | 0   | 0   | 0    | 0    | 0    | 0    | 0    | 0  | 0  | 0   | 999 | 0    | 0     | 0     | 999   | 0     | 0     | 0     | 0     | 0     | 0     | 0     | 0 | 0 | 0 |   |
| 32 | 0   | 1   | 0    | 1    | 1    | 1    | 1    | 1    | 1    | 1    | 0    | 0   | 1   | 0    | 1    | 1    | 1    | 0    | 0  | 0  | 0   | 999 | 0    | 0     | 0     | 999   | 0     | 0     | 0     | 0     | 0     | 0     | 0     | 0 | 0 | 0 | 0 |
| 33 | 1   | 1   | 1    | 1    | 0    | 1    | 0    | 1    | 0    | 1    | 1    | 1   | 1   | 1    | 1    | 1    | 1    | 1    | 1  | 1  | 0   | 999 | 0    | 1     | 0     | 1     | 999   | 0     | 1     | 1     | 1     | 1     | 1     | 0 | 0 | 0 |   |
| 34 | 0   | 0   | 0    | 1    | 1    | 1    | 1    | 0    | 1    | 0    | 0    | 0   | 0   | 0    | 0    | 0    | 0    | 0    | 0  | 0  | 0   | 999 | 0    | 0     | 0     | 999   | 0     | 0     | 0     | 0     | 0     | 0     | 0     | 0 | 0 | 0 | 0 |
| 35 | 1   | 1   | 0    | 1    | 1    | 1    | 1    | 1    | 1    | 1    | 1    | 1   | 1   | 1    | 1    | 1    | 1    | 1    | 1  | 1  | 0   | 999 | 0    | 1     | 1     | 1     | 999   | 1     | 1     | 1     | 1     | 1     | 1     | 1 | 1 | 1 |   |
| 36 | 0   | 0   | 0    | 0    | 0    | 0    | 0    | 0    | 0    | 0    | 1    | 0   | 1   | 0    | 0    | 0    | 0    | 0    | 0  | 0  | 0   | 999 | 0    | 1     | 0     | 999   | 0     | 0     | 0     | 0     | 0     | 0     | 0     | 0 | 0 | 0 | 0 |
| 37 | 0   | 1   | 0    | 1    | 0    | 1    | 1    | 1    | 0    | 1    | 0    | 1   | 0   | 1    | 1    | 1    | 1    | 1    | 1  | 1  | 1   | 0   | 999  | 0     | 1     | 1     | 0     | 999   | 1     | 1     | 1     | 1     | 1     | 1 | 0 | 0 | 1 |
| 38 | 0   | 1   | 0    | 1    | 0    | 0    | 0    | 0    | 0    | 0    | 1    | 0   | 1   | 0    | 1    | 0    | 1    | 0    | 1  | 0  | 0   | 999 | 0    | 0     | 0     | 999   | 0     | 0     | 0     | 0     | 0     | 0     | 0     | 0 | 0 | 0 | 0 |
| 39 | 0   | 1   | 0    | 1    | 1    | 1    | 1    | 1    | 1    | 0    | 0    | 0   | 0   | 0    | 0    | 0    | 0    | 0    | 0  | 0  | 0   | 999 | 0    | 0     | 0     | 999   | 0     | 0     | 0     | 0     | 0     | 0     | 0     | 0 | 0 | 0 | 0 |
| 40 | 1   | 1   | 1    | 1    | 1    | 1    | 1    | 1    | 1    | 0    | 1    | 1   | 1   | 1    | 1    | 1    | 1    | 1    | 1  | 1  | 1   | 999 | 0    | 1     | 1     | 1     | 999   | 1     | 1     | 1     | 1     | 1     | 1     | 1 | 1 | 1 | 1 |
| 41 | 0   | 1   | 0    | 1    | 1    | 1    | 1    | 1    | 0    | 0    | 0    | 0   | 0   | 0    | 0    | 0    | 0    | 0    | 0  | 0  | 0   | 999 | 0    | 0     | 0     | 999   | 0     | 0     | 0     | 0     | 0     | 0     | 0     | 0 | 0 | 0 | 0 |
| 42 | 0   | 0   | 0    | 1    | 0    | 0    | 0    | 0    | 0    | 0    | 0    | 0   | 0   | 0    | 0    | 0    | 0    | 0    | 0  | 0  | 0   | 999 | 0    | 0     | 0     | 999   | 0     | 0     | 0     | 0     | 0     | 0     | 0     | 0 | 0 | 0 | 0 |
| 43 | 0   | 0   | 0    | 1    | 1    | 1    | 1    | 1    | 0    | 0    | 0    | 0   | 0   | 0    | 0    | 0    | 0    | 0    | 0  | 0  | 0   | 999 | 0    | 0     | 0     | 999   | 0     | 0     | 0     | 0     | 0     | 0     | 0     | 0 | 0 | 0 | 0 |
| 44 | 1   | 1   | 1    | 1    | 1    | 1    | 1    | 1    | 1    | 1    | 1    | 1   | 1   | 1    | 1    | 1    | 1    | 1    | 1  | 1  | 1   | 999 | 1    | 1     | 1     | 999   | 1     | 1     | 1     | 1     | 1     | 1     | 1     | 1 | 1 | 1 | 1 |
| 45 | 0   | 1   | 0    | 1    | 1    | 1    | 1    | 0    | 1    | 1    | 1    | 1   | 1   | 1    | 1    | 1    | 1    | 1    | 1  | 1  | 0   | 999 | 0    | 1     | 1     | 999   | 1     | 1     | 1     | 1     | 1     | 1     | 1     | 0 | 0 | 0 | 0 |
| 46 | 0   |     |      |      |      |      |      |      |      |      |      |     |     |      |      |      |      |      |    |    |     |     |      |       |       |       |       |       |       |       |       |       |       |   |   |   |   |
